# Supplementary material for: Transparent Ultraviolet (UV)-Shielding Films Made from Waste Hemp Hurd and Polyvinyl Alcohol (PVA)
Source: Polymers (Basel). 2020 May 22;12(5):1190. doi: 10.3390/polym12051190 (PMC7284461; doi:10.3390/polym12051190)
Supplement: Supplementary file 1 [file polymers-12-01190-s001.pdf]

## Supplementary Materials

# Transparent Ultraviolet (UV)-shielding films made from waste hemp hurd and Polyvinyl Alcohol (PVA)

Yi Zhang<sup>1</sup>, Rechana Remadevi<sup>1</sup>, Juan P Hinestroza<sup>2</sup>, Xungai Wang<sup>1</sup>, Maryam Naebe<sup>1\*</sup>

<sup>1</sup> Deakin University, Institute for Frontier Materials, 75 Pigdons Road, Geelong, Victoria, 3216, Australia

<sup>2</sup> Cornell University, Fiber Science and Apparel Design, Ithaca, New York 14853, United States

\* Correspondence: maryam.naebe@deakin.edu.au;

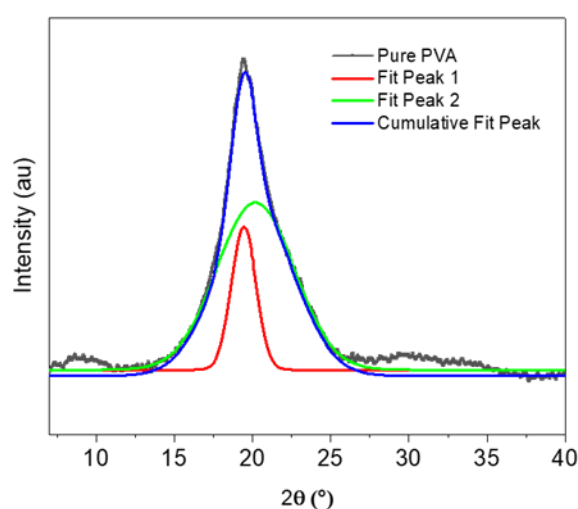

**Figure S1.** The deconvolution of XRD patterns of pure PVA film
